# Supplementary material for: Promoting visible light-driven hydrogen evolution over CdS nanorods using earth-abundant CoP as a cocatalyst
Source: Royal Society of Chemistry journal article supplement (doi:10.1039/c6ra04612f), 2016-01-01
Supplement: c6ra04612f1.pdf [file c6ra04612f1.pdf]

## Supporting Information

# Promoting Photocatalytic Hydrogen Evolution of CdS under Visible Light Using Earth-Abundant Cocatalysts CoP

*Dan Zhao,<sup>ab</sup> Bing Sun,<sup>b</sup> Xiangqing Li,<sup>a</sup> Lixia Qin,<sup>a</sup> Shizhao Kang,<sup>\*a</sup> Dong Wang<sup>\*b</sup>*

<sup>a</sup> School of Chemical and Environmental Engineering, Shanghai Institute of Technology, 100  
Haiquan Road, Shanghai 201418, China.

<sup>b</sup> Beijing National Laboratory for Molecular Sciences, Key Laboratory of Molecular  
Nanostructure and Nanotechnology, Institute of Chemistry, Chinese Academy of Science, 2  
North 1st Street, Zhongguancun, Beijing 100190, China.

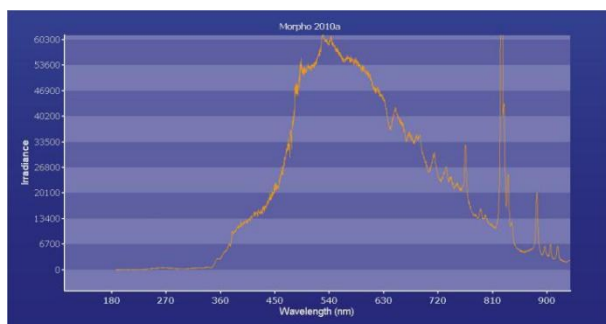

**Figure S1.** The emission spectra of Xe lamp without the cut-off filter.

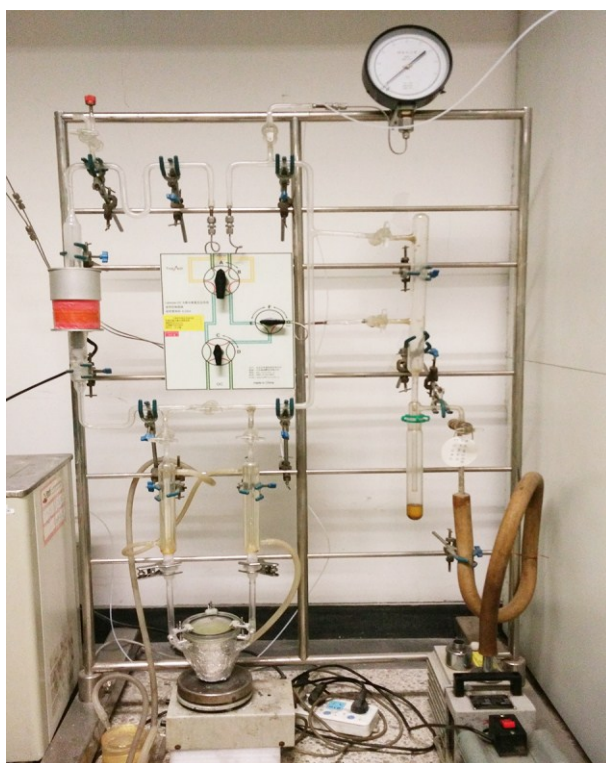

**Figure S2.** The hydrogen plant of photocatalytic experiment.

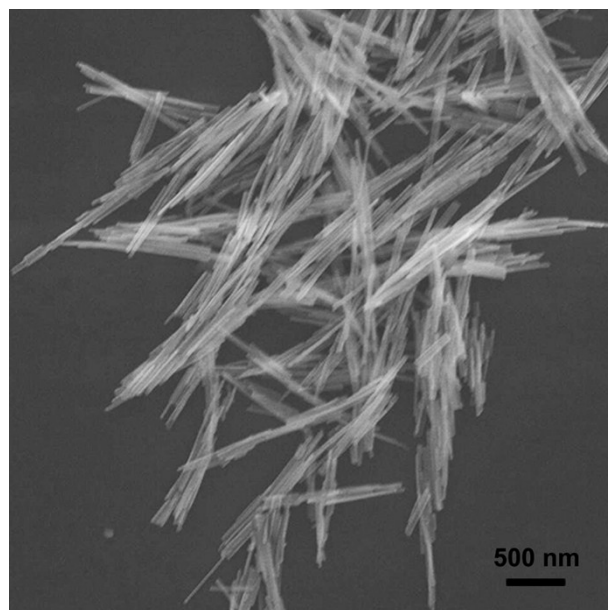

**Figure S3.** FESEM image of CdS nanorods.

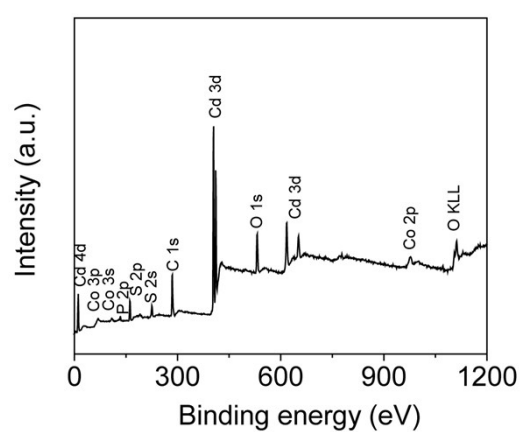

**Figure S4.** The XPS data of CoP/CdS-3%.

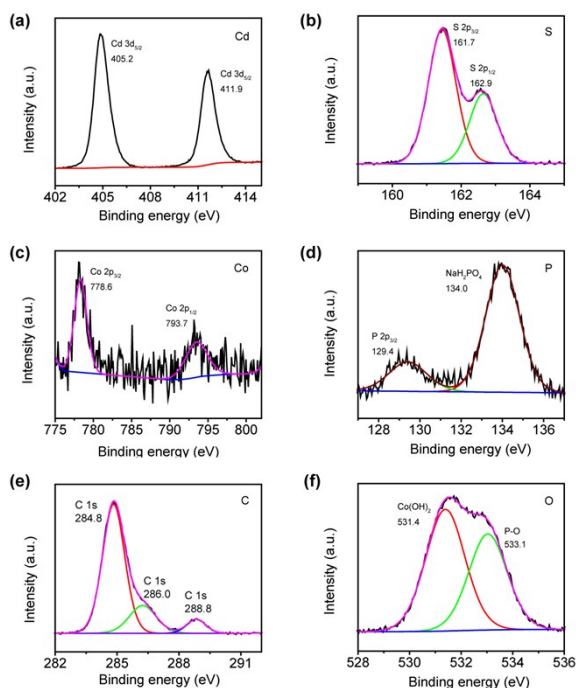

**Figure S5.** The high resolution XPS spectrum of Cd3d, S2p, Co2p, P2p, C1s and O1s.

Figure S5a, b suggest the existence of  $\text{Cd}^{2+}$  and  $\text{S}^{2-}$ . Fig S5c shows the high resolution XPS of Co 2p core level, and there are two main peaks at 778.6 eV in the Co  $2p_{3/2}$  region and 793.7 eV in the Co  $2p_{1/2}$  region. Fig S5d exhibits two peaks at 129.4 eV corresponding to P  $2p_{3/2}$  region and one broad peak at 134.0 eV. The peaks at 778.6 eV and 129.4 eV are close to the binding energies of Co and P in CoP nanocrystal, while the peaks at 793.7 eV and 134.0 eV are assigned to the oxidized Co and P species. Figure S5e shows high resolution XPS of C, and the peaks of C at 286.0 eV and 288.8 eV come from the  $\text{CO}_2$  or impurity adsorbed on the surface of photocatalyst or instrument. Figure S5f indicates that the presence of  $\text{Co(OH)}_2$  and unreacted  $\text{PO}_4^{3-}$ .

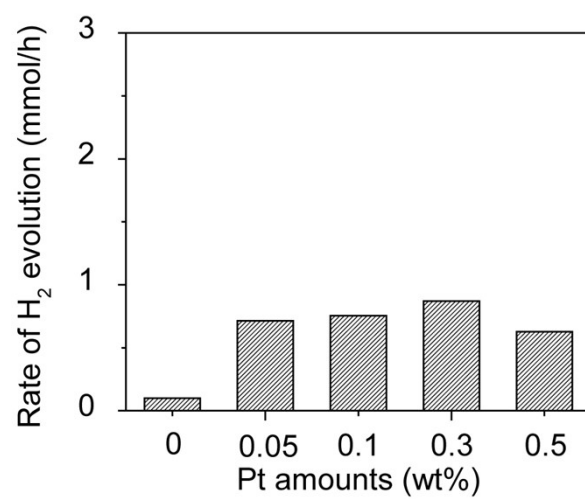

**Figure S6.** The hydrogen evolution rate of CdS with different amounts of Pt (loading by photo-deposition method).
